# Supplementary material for: Coccolithophore calcification response to past ocean acidification and climate change
Source: PubMed Central journal article supplement (PMC4243242; doi:10.1038/ncomms6363), 2014-11-17
Supplement: ncomms6363-s1.pdf [file ncomms6363-s1.pdf]

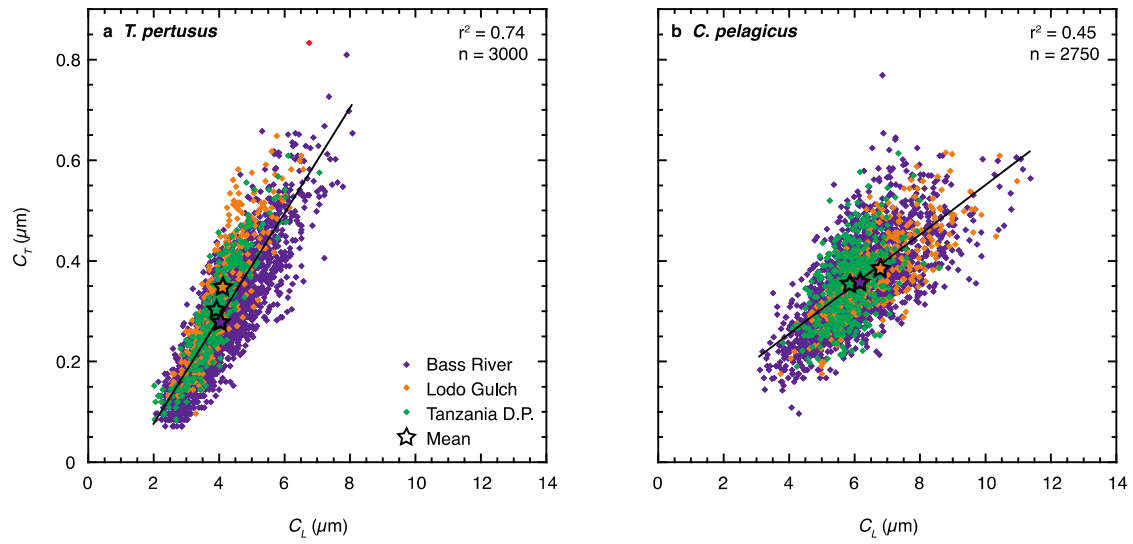

**Supplementary Figure 1. Coccolith length ( $C_L$ ) and thickness ( $C_T$ ) at Bass River, Lodo Gulch and Tanzania.**

**a**, *Toweius pertusus* and **b**, *Coccolithus pelagicus* at Bass River (purple), Lodo Gulch (orange) and Tanzania (green). Stars indicate site means.

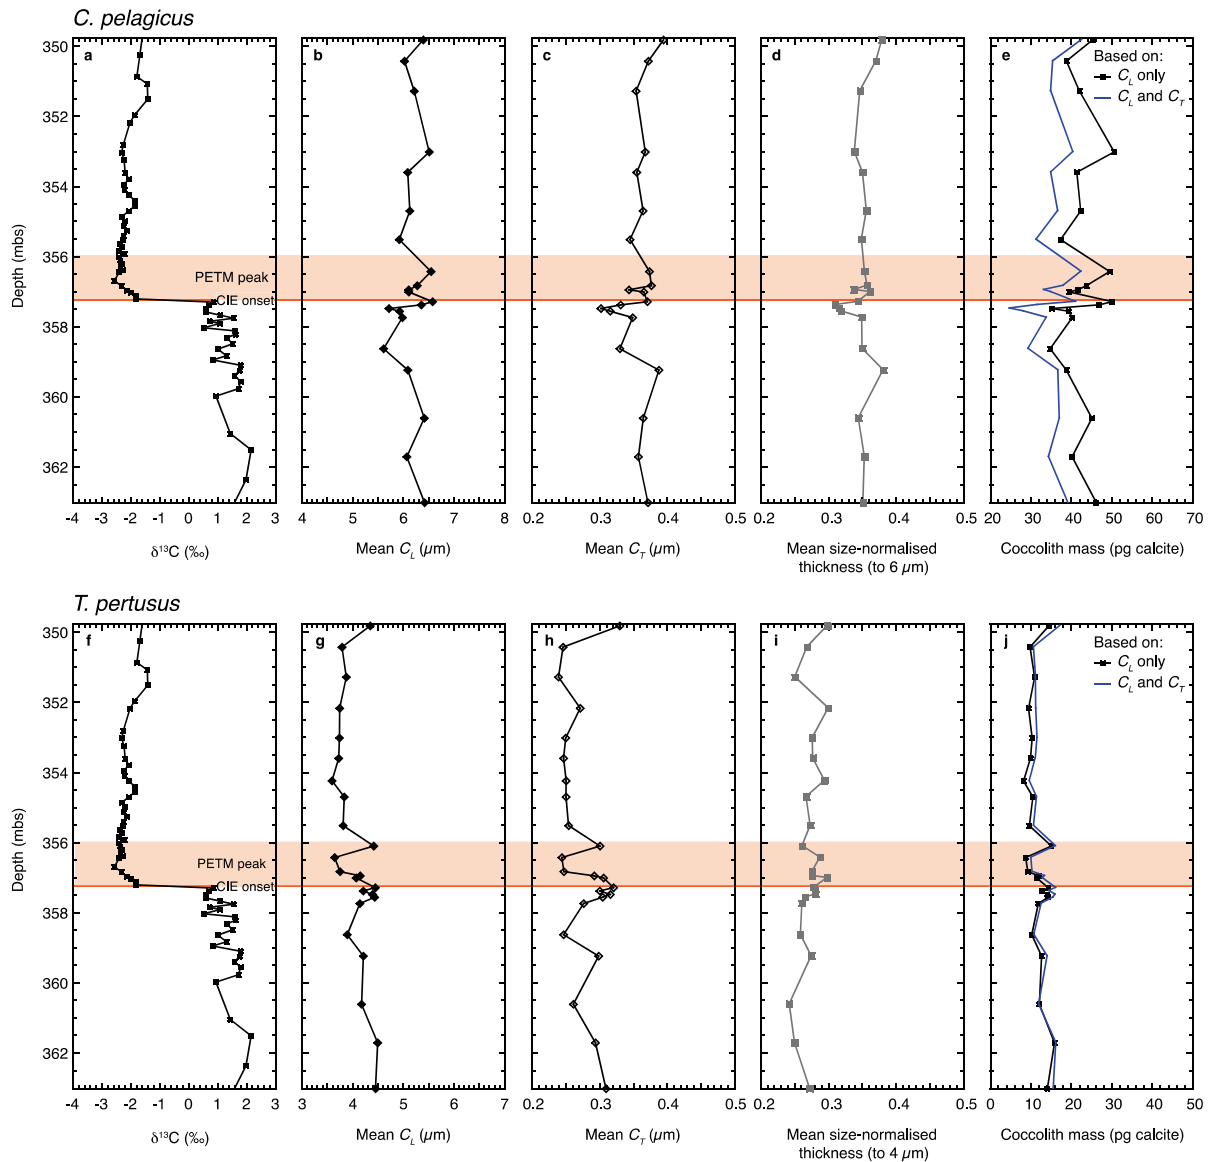

**Supplementary Figure 2. Downcore stable isotope and coccolith morphometric records at Bass River, New Jersey.**

**a, f**, Bulk carbon isotope values (data from John *et al.*<sup>1</sup>) are shown. **b-e** and **g-j** show mean coccolith length ( $C_L$ ), coccolith thickness ( $C_T$ ), size-normalised thickness and coccolith mass estimates for *C. pelagicus* and *T. pertusus*, respectively. Coccolith mass estimates based on variations in  $C_L$  are shown (black squares) along with coccolith mass estimates that include variations in  $C_L$  and  $C_T$ , which assume that change in  $C_T$  alters the proximal shield, distal shield and tube cycle (blue line). Variations in thickness account for a larger proportion of coccolith mass change in *C. pelagicus* than *T. pertusus*. The onset of the carbon isotope excursion (CIE; orange line) and interval of peak warmth during the PETM (orange shading) are indicated (following John *et al.*<sup>1</sup>).

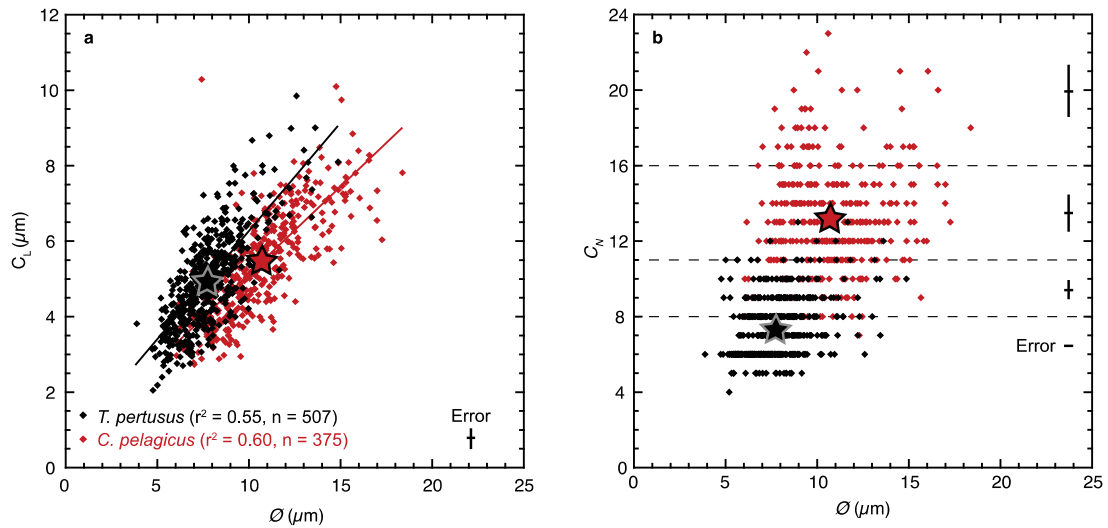

**Supplementary Figure 3. Coccosphere morphometric data for *T. pertusus* and *C. pelagicus* at Bass River**

**a**, Coccolith length ( $C_L$ ) and coccosphere size ( $\varnothing$ ). **b**, Number of coccoliths per coccosphere ( $C_N$ ) and  $\varnothing$ . Stars indicate means.  $\varnothing$  error is based on measurement replicates and  $C_L$  error is based on replicates and uncertainty in coccolith tube cycle to coccolith diameter conversion (see Fig. 2 of Gibbs *et al.*<sup>2</sup>).  $C_N$  uncertainty is minimal when coccospheres have 8 or fewer coccoliths, but increases with increasing  $C_N$  (indicated by dashed lines).

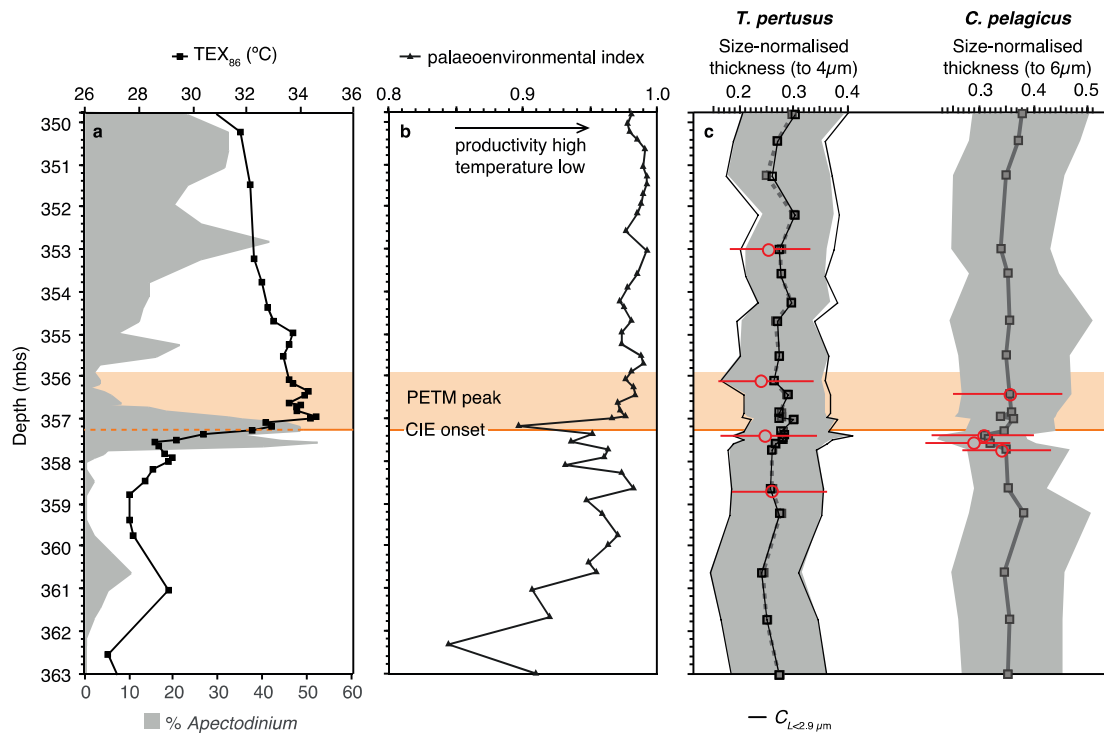

**Supplementary Figure 4. Temperature, palaeoenvironment and coccolith size-normalised thickness records at Bass River, New Jersey.**

**a**, TEX<sub>86</sub> temperature and *Apectodinium* percent abundance records are from Sluijs *et al.*<sup>3</sup>, with the TEX<sub>86</sub> temperature scale based on the calibration of Schouten *et al.*<sup>4</sup>. **b**, Nannofossil palaeoenvironmental index from Gibbs *et al.*<sup>5</sup>. **c**, Mean size-normalised thickness (as in Fig. 1) for *T. pertusus* and *C. pelagicus*, with the mean and 5th and 95th percentiles of repeated samples indicated (red circles). Mean size-normalised thickness and 5th and 95th percentiles of *T. pertusus* calculated without the small ( $C_{L<2.9\mu m}$ ) morphotype (black squares and lines) are superimposed on the original pattern (as in Fig. 1, here shown with a dashed line and grey shading). The carbon isotope excursion (CIE; orange line) and interval of peak warmth during the PETM (orange shading) are indicated (following John *et al.*<sup>1</sup>).

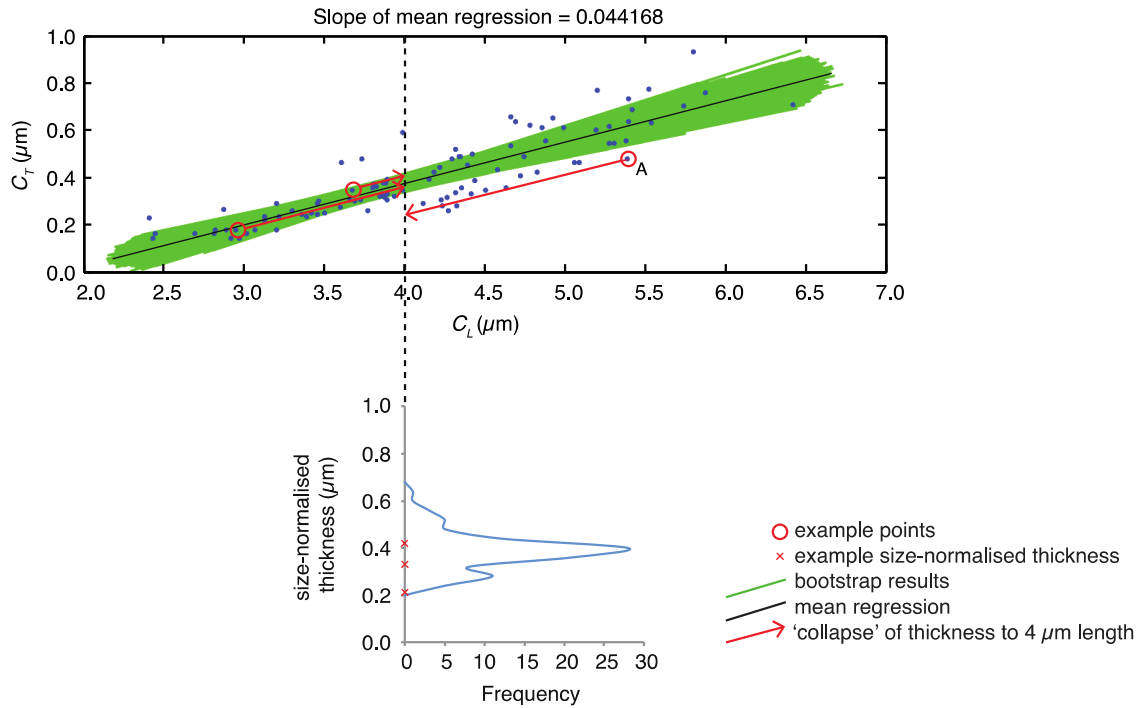

**Supplementary Figure 5. Calculating coccolith size-normalised thickness from length and thickness measurements.**

Results of the bootstrapped linear regression for 100 measurements from 1 sample of coccolith length ( $C_L$ ) and thickness ( $C_T$ ) of *T. pertusus* at Bass River (blue points). 100,000 bootstrap results are shown (green lines), with the mean regression superimposed upon these (black). Red arrows describe the ‘collapse’ of three example data points (circled red) to a consistent length (4  $\mu\text{m}$ ) along the mean slope of the bootstrapped regression. Size-normalised thickness for point ‘A’ (length = 5.39  $\mu\text{m}$ ; thickness = 0.48  $\mu\text{m}$ ) is calculated as  $((4 - 5.39) \times 0.044168) + 0.48 = 0.42 \mu\text{m}$ . The histogram shows the distribution for all 100 coccoliths in this sample, with size-normalised thickness for the three example data points indicated (red cross).

**Coccolithus pelagicus****Toweius pertusus**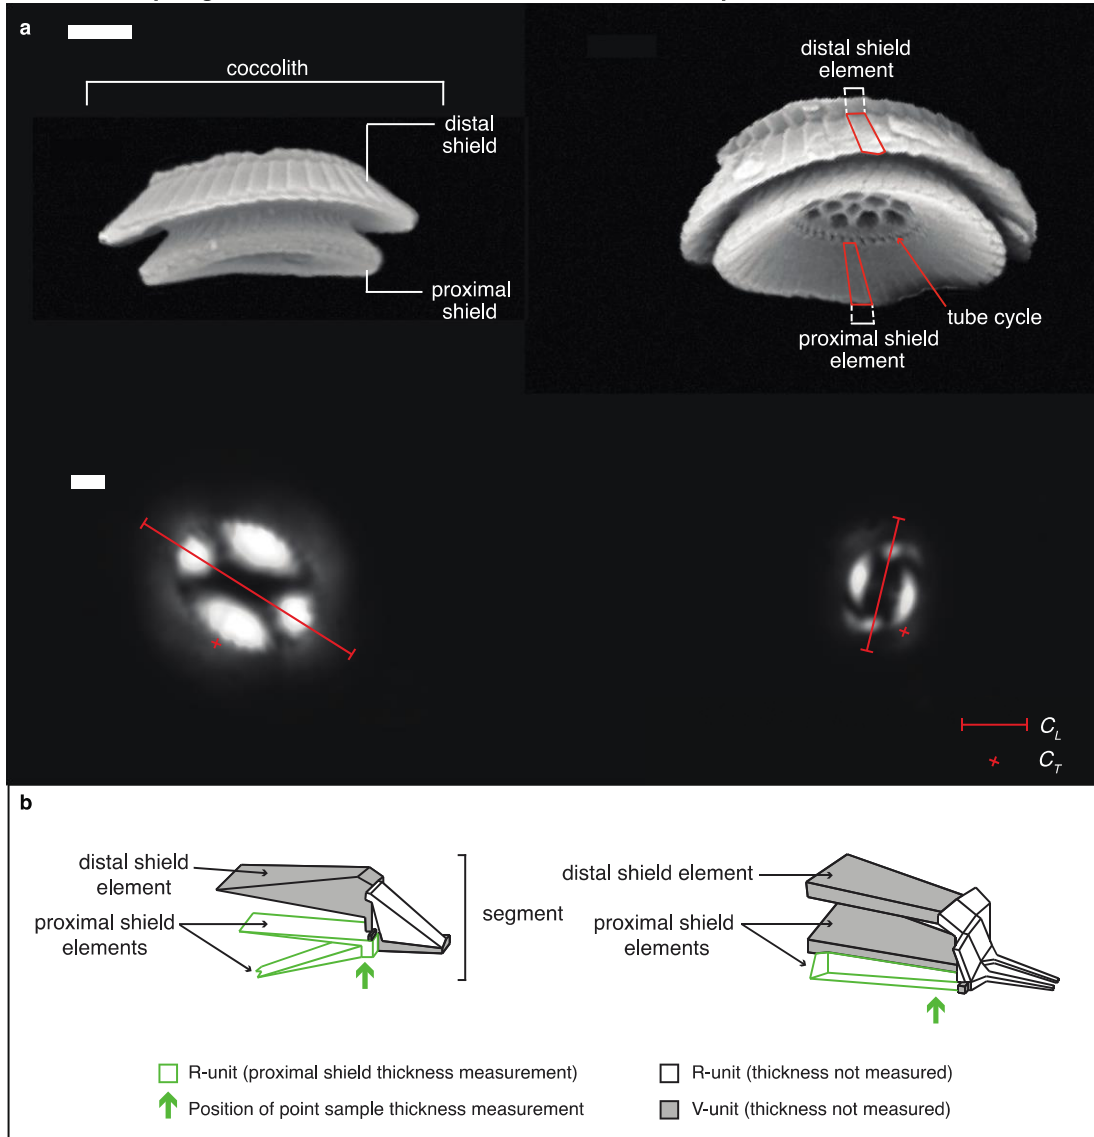**Supplementary Figure 6. Coccolith structure and crystallographic axes.**

**a**, Scanning electron micrographs and light micrographs of *C. pelagicus* and *T. pertusus* coccoliths. Scale bars indicate 1 μm. **b**, Schematic diagrams of coccolith structure and crystallographic axes of V- and R-unit elements for *C. pelagicus* and *T. pertusus* (redrawn after Young *et al.*<sup>6</sup>) with the position of point sample thickness measurements indicated (green arrows).

**[Following page] Supplementary Figure 7. Calibration of grey value to calcite thickness.**

**a**, First principles theoretical  $\sin^2$  relationship between greyscale values, retardation and thickness of calcite crystals. **b**, True natural greyscale spectra measured at equal distances (arbitrary units) along a quartz wedge at different microscope light intensities. The theoretical  $\sin^2$  relationship between grey value and retardation has been fitted for each of the natural spectra (blue shading). The natural spectrum produced with the 'pre-set' microscope and camera conditions utilised for coccolith thickness measurements is shown with orange diamonds, and has been fitted with a first principles theoretical curve (red). The section of the calibration used to determine coccolith thickness herein is marked (dashed red line). Grey values from 0 to ~6 arbitrary units along the quartz wedge record a decrease in thickness to 0 μm, which results from the processes used to manufacture the quartz wedge. Thickness of calcite where the radial c-axis is inclined at 10° from horizontal (e.g., in the proximal shield of *C. pelagicus*) is indicated.

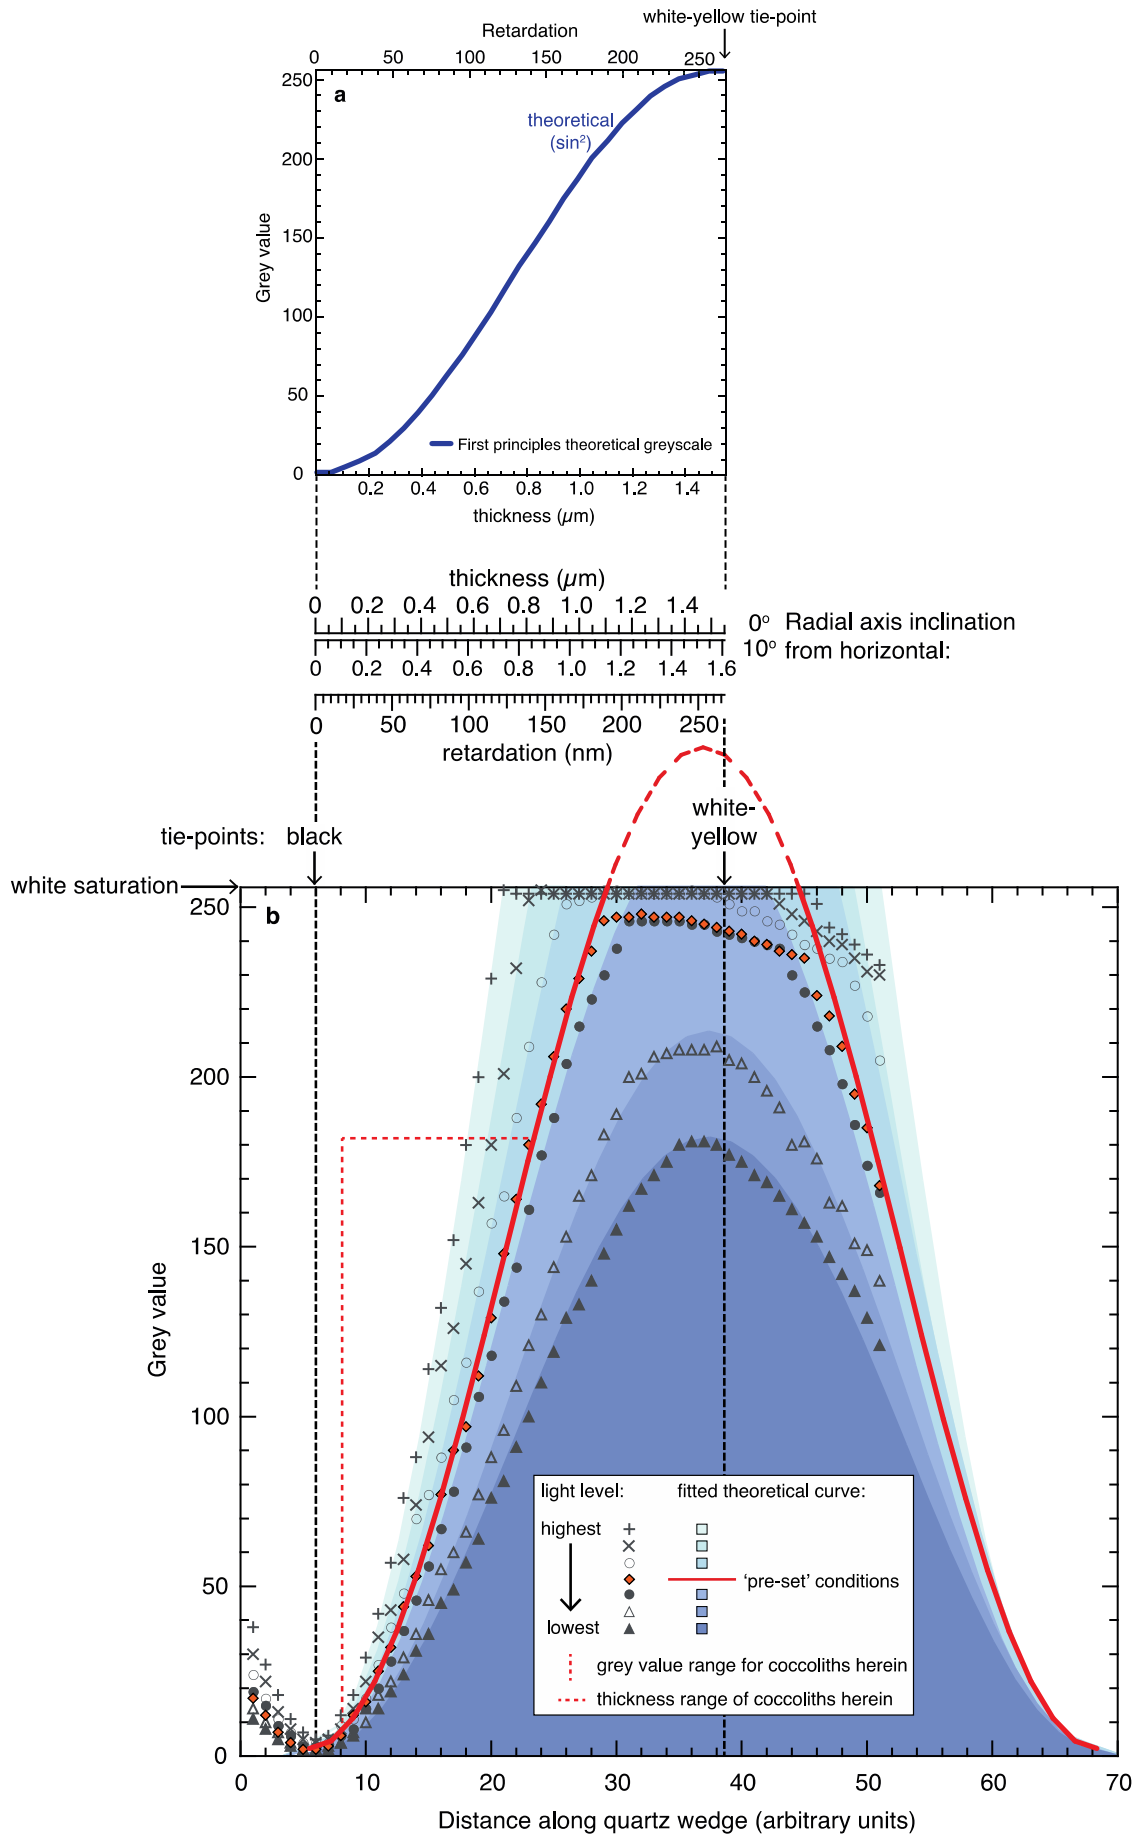

**Supplementary Table 1. Akaike Information Criterion for mixture analyses**

|                                                  | <i>Coccolithus</i> |       |       | <i>Toweius</i> |       |       |
|--------------------------------------------------|--------------------|-------|-------|----------------|-------|-------|
| No. of morphotypes modelled                      | 1                  | 2     | 3     | 1              | 2     | 3     |
| Akaike Information Criterion (AIC <sub>c</sub> ) | 3575               | 3432  | 3426  | 2722           | 2506  | 2458  |
| Akaike weight                                    | 0.000              | 0.047 | 0.953 | 0.000          | 0.000 | 1.000 |

## 1 Supplementary Methods

### 2 Measuring the thickness of Paleogene coccoliths

3 Methods that utilise birefringence to estimate the mass of calcite associated with individual  
4 coccoliths make use of the relationship between the thickness of a calcite crystal and its interference  
5 (or polarisation) colour when viewed under cross- or circular-polarised light<sup>7,8</sup>. When passing  
6 through a calcite crystal, polarised light is refracted into two perpendicular rays that travel at  
7 different velocities, with the slower ray being retarded in relation to the faster ray. The degree of  
8 retardation is a function of birefringence (the difference between the refractive indices) and the  
9 thickness of the crystal. Viewed under circular-polarised light, or with a consistent orientation of the  
10 crystallographic-axes (c-axes) under cross-polarised light, calcite crystals reveal interference colours,  
11 the first order (retardation values of 0-550 nm) of which range from black (zero order), through grey  
12 to white, white-yellow, orange and red, with increasing crystal thickness.

13 Coccoliths comprise individual calcite crystal units with c-axes of either vertical to sub-vertical (V-  
14 units) or horizontal to sub-horizontal (radial, R-units) orientation<sup>9,10</sup>. When coccoliths are in plan  
15 view (their typical orientation in standard smear slides), the V-unit elements will be dark under  
16 cross- or circular-polarised light because a vertical c-axis does not produce any retardation,  
17 therefore only those elements with radial c-axes are clearly visible. Existing techniques estimate the  
18 weight of individual coccoliths by measuring birefringence of R-units under cross- or circular-  
19 polarised light. The techniques utilise the relationship between interference colour and calcite



20 crystal thickness to calibrate from grey pixel values (obtained from black and white images) to  
21 coccolith thickness, integrating this across the coccolith area to estimate weight<sup>11-17</sup>. These  
22 techniques have been applied to the skeletal remains of modern and Quaternary coccolithophores  
23 but are unsuitable for use on pre-Quaternary coccoliths for two reasons. First, unlike the coccoliths  
24 of Quaternary and modern Isochrysidales taxa, which are predominantly composed of R-unit  
25 elements, many pre-Quaternary coccoliths incorporate large V-unit crystals and are therefore not  
26 fully birefringent across the coccolith (Supplementary Fig. 6). Second, the dominant Paleogene  
27 placolith taxa are substantially larger than modern and Quaternary coccoliths, and their thickness  
28 produces birefringence that extends beyond the grey part of the spectrum of interference colours.  
29 We have therefore modified existing methods to measure the point of maximum thickness of R-unit  
30 elements of the proximal shield, which, for our focal taxa *Coccolithus* and *Toweius*, remain within the  
31 grey-white part of the spectrum of interference colours (Supplementary Fig. 6). Although the tube  
32 cycles of *Coccolithus* and *Toweius* also incorporate R-units (Supplementary Fig. 6), tube cycle  
33 thickness often exceeds 1.55  $\mu\text{m}$ , thereby producing interference colours that extend beyond the  
34 grey-white part of the spectrum, which cannot be measured accurately using our technique.  
35 Specifically, we measure the greyscale value of the point of maximum birefringence (and therefore  
36 thickness) of the proximal shield when the tube cycle is in focus.

### 37 **Coccolith thickness calibration**

38 Conversion of point sample grey values to calcite thickness requires, first, an understanding of the  
39 relationship between greyscale values and calcite thickness and second, application of this  
40 relationship to specific microscope and camera systems. First principles theoretical calculations,  
41 supported by experimental data, indicate that a  $\sin^2$  relationship exists between microscope light  
42 intensity and retardation of birefringent materials<sup>18,19</sup>. Therefore, provided that the relationship  
43 between microscope light intensity and camera-assigned greyscale is linear, the relationship  
44 between grey value and calcite thickness (which is proportional to retardation), is also, theoretically,

45 described by a  $\sin^2$  curve (Supplementary Fig. 7a). Our observations across various natural spectra,  
46 including quartz wedges (the thickness of which increases linearly with distance along the wedge),  
47 mica grains and stacked birefringent plastic sheets confirm the  $\sin^2$  shape of the relationship  
48 between camera-recorded grey values and crystal thickness (Supplementary Fig. 7b). Importantly,  
49 greyscale values measured at equal distances (referred to as arbitrary units) along a quartz wedge  
50 provide a means by which to identify black (zero order) and the white-yellow transition in  
51 interference colour, i.e., 0 and 267 nm retardations, respectively. These provide tie-points to  
52 corresponding theoretical calcite thicknesses of 0 and 1.55  $\mu\text{m}$ , respectively (Michel Lévy chart;  
53 Supplementary Fig. 7b), which can be used to convert distance along the quartz wedge to calcite  
54 thickness.

55 Ideally, conversion of point sample grey values to calcite thickness would utilise a microscope and  
56 camera set-up that reproduces the first principles ( $\sin^2$ ) theoretical curve between grey value and  
57 thickness in its optimum position, i.e., 'pinned' to minimum and maximum greyscale values such that  
58 black = 0 and white = 255 and these correspond exactly with thicknesses of 0 and  $\sim 1.55 \mu\text{m}$ ,  
59 respectively (Supplementary Fig. 7a). In practice, however, it is difficult to reproduce this 'optimal'  
60 relationship between grey value and crystal thickness by altering the microscope and camera  
61 conditions (primarily those factors that influence light intensity: lamp illumination, condenser  
62 alignment, position of polarisers, magnification and camera exposure time). For simplicity, and  
63 reliability of reproducibility tests, all coccolith thickness measurements herein are taken at a  
64 consistent light intensity, controlled by using a pre-set lamp illumination (manufacturer-defined) and  
65 a constant alignment of the condenser, position of polarisers, magnification (x100 objective) and  
66 camera exposure time (all checked prior to data collection for each sample). At these specific 'pre-  
67 set' microscope conditions, grey values collected at equal distances along a quartz wedge reveal that  
68 the natural spectrum saturates prematurely (i.e., saturation occurs where thickness =  $\sim 1.1 \mu\text{m}$ ,  
69 rather than 1.55  $\mu\text{m}$ ). Therefore, to constrain the position of the pre-set (saturated) greyscale curve  
70 with respect to the first principles ( $\sin^2$ ) theoretical curve, we collected greyscale values from

71 multiple natural spectra along a quartz wedge at a range of light levels, both higher and lower than  
72 the pre-set light intensity (Supplementary Fig. 7b). From this, we assign a thickness value to each of  
73 the grey values, as predicted by this theoretical relationship. These thickness values can be adjusted  
74 to account for the inclination of the radial c-axis from horizontal in coccoliths, which is negligible in  
75 *T. pertusus* but  $\sim 10^\circ$  in *C. pelagicus*<sup>7</sup> (Supplementary Fig. 7).

76 The greyscale saturation produced using the pre-set microscope and camera conditions does not  
77 affect our ability to measure the thickness of Paleogene *Coccolithus* and *Toweius* specimens,  
78 because the grey values collected herein do not exceed 185, and therefore remain significantly  
79 below white saturation values of the applied theoretical curve. However, the premature greyscale  
80 saturation of the pre-set microscope conditions might become a consideration when measuring  
81 other taxa or other time intervals, particularly if specimens are thicker than those measured herein,  
82 requiring a necessary adjustment of the microscope light intensity or camera exposure time. Also of  
83 note are the subtle differences in the shape of the natural spectra and their theoretical counterparts  
84 where grey values exceed  $\sim 245$ , a function of the difference between theoretical greyscale values  
85 and the conversion of natural interference colours to greyscale (Supplementary Fig. 7b).

#### 86 **Uncertainty and reproducibility of size-normalised thickness measurements**

87 Uncertainty on mean size-normalised thickness is estimated for each sample as two standard  
88 deviations across the bootstrap results at the length to which thickness is being normalised. To  
89 minimise this uncertainty, we estimate size-normalised thickness at the length that shows least  
90 uncertainty from a bootstrap of all samples for each species, which is 4  $\mu\text{m}$  for *T. pertusus* and 6  $\mu\text{m}$   
91 for *C. pelagicus*. Measurement error is quantified based on replicates for both species and is  
92 incorporated into the bootstrapped regression by assigning error to each coccolith measurement,  
93 randomly selected from within 2 standard deviations of calculated measurement error.  
94 Reproducibility of the size-normalised thickness data was assessed by repeating measurements of  
95 length and size-normalised thickness for 4 samples for each species (Supplementary Fig. 4c). We

96 note that the repeated estimates of size-normalised thickness differ more from the original samples  
97 in *T. pertusus* than in *C. pelagicus*, probably due to the greater variability in size-normalised  
98 thickness in *T. pertusus* populations. Importantly, the minimum in size-normalised thickness  
99 recorded in the original samples of *C. pelagicus* is also evident from the repeated measurements.

#### 100 **Preservational control on coccolith thickness**

101 Coccolith preservation is exceptionally good at Bass River, Lodo Gulch and Tanzania across the  
102 PETM, revealing only minor dissolution from organic carbon degradation (degraded samples were  
103 avoided where possible) with no evidence of secondary overgrowth. Breakage and minor dissolution  
104 of the radial c-axis units of the proximal shield revealed by SEM images (Figure 2) does not affect our  
105 thickness measurements, which consistently record maximum point thickness of the proximal shield.  
106 Where we do observe slightly poorer preservation, it is mostly manifested as incised edges,  
107 breakage and loss of the R-units of the proximal shield, without resulting in obvious thinning that  
108 could impact our estimates of coccolith thickness.

#### 109 **Supplementary References**

- 110 1. John, C. M. *et al.* North American continental margin records of the Paleocene-Eocene thermal  
111 maximum: Implications for global carbon and hydrological cycling. *Paleoceanography* **23**,  
112 doi:10.1029/2007pa001465 (2008).
- 113 2. Gibbs, S.J. *et al.* Species-specific growth response of coccolithophores to Palaeocene-Eocene  
114 environmental change. *Nature Geoscience*, **6**, 218-222 doi:10.1038/ngeo1719 (2013).
- 115 3. Sluijs, A. *et al.* Environmental precursors to rapid light carbon injection at the Palaeocene/Eocene  
116 boundary. *Nature* **450**, 1218-1222, doi:10.1038/Nature06400 (2007).
- 117 4. Schouten, S. *et al.* Extremely high sea-surface temperatures at low latitudes during the middle  
118 Cretaceous as revealed by archaeal membrane lipids. *Geology* **31**, 1069-1072 (2003).

- 119 5. Gibbs, S. J., Stoll, H. M., Bown, P. R. & Bralower, T. J. Ocean acidification and surface water  
120 carbonate production across the Paleocene-Eocene thermal maximum. *Earth and Planetary Science*  
121 *Letters* **295**, 583-592, doi:10.1016/J.Epsl.2010.04.044 (2010).
- 122 6. Young, J. R., Davis, S. A., Bown, P. R. & Mann, S. Coccolith ultrastructure and biomineralisation.  
123 *Journal of Structural Biology* **126**, 195-215 (1999).
- 124 7. Young, J. R. Description and analysis of coccolith structure. In, Hamrsmid, B. and Young, J.R., (eds.)  
125 *Proceedings of the 4th International Nannoplankton Association Conference Prague 1991*. 35-71,  
126 Knihovnicka zemniho plynu a nafta, Hodonin (1993).
- 127 8. Higgins, M.D. Imaging birefringent minerals without extinction using circularly polarized light. *The*  
128 *Canadian Mineralogist* **48**, 231-235, doi:10.3749/canmin.48.1.231 (2010).
- 129 9. Young, J. R., Didymus, J. M., Bown, P. R., Prins, B. & Mann, S. Crystal assembly and phylogenetic  
130 evolution in heterococcoliths. *Nature* **356**, 516-518 (1992).
- 131 10. Young, J.R. *et al.* Guidelines for coccolith and calcareous nannofossil terminology, *Paleontology*  
132 **40** 875-912 (1997).
- 133 11. Beaufort, L. Weight estimates of coccoliths using the optical properties (birefringence) of calcite.  
134 *Micropaleontology* **51**, 289-297 (2005).
- 135 12. Beaufort, L., Probert, I. & Buchet, N. Effects of acidification and primary production on coccolith  
136 weight: Implications for carbonate transfer from the surface to the deep ocean. *Geochemistry*  
137 *Geophysics Geosystems* **8**, doi:10.1029/2006gc001493 (2007).
- 138 13. Beaufort, L., Couapel, M., Buchet, N., Claustre, H. & Goyet, C. Calcite production by  
139 coccolithophores in the south east Pacific Ocean. *Biogeosciences* **5**, 1101-1117 (2008).
- 140 14. Beaufort, L. *et al.* Sensitivity of coccolithophores to carbonate chemistry and ocean acidification.  
141 *Nature* **476**, 80-83, doi:10.1038/Nature10295 (2011).

- 142 15. Cubillos, J., Henderiks, J., Beaufort, L., Howard, W. R. & Hallegraeff, G. M. Reconstructing  
143 calcification in ancient coccolithophores: Individual coccolith weight and morphology of *Coccolithus*  
144 *pelagicus* (sensu lato). *Marine Micropaleontology* **92-93**, 29-39 (2012).
- 145 16. Bollmann, J. Technical note: weight approximation of single coccoliths inferred from retardation  
146 estimates using a light microscope equipped with a circular polariser – (the CPR Method).  
147 *Biogeosciences Discussions*, **10**, 11155-111179, doi: 10.5194/bgd-10-11155-2013 (2013).
- 148 17. Fuertes, M.A., Flores, J.A., & Sierro, F.J. A new technique for observing calcareous nannofossils:  
149 methodology and applications. *14<sup>th</sup> INA Conference, Reston, Virginia, U.S.A., abstracts*. International  
150 Nannoplankton Association, Inc. Harcourt Colour Print, Swansea, U.K. (2013).
- 151 18. Kocsis, K., Hyttinen, M., Helminen, H.J., Aydelotte, M.B. & Módis, L. Combination of digital image  
152 analysis and polarisation microscopy: theoretical considerations and experimental data. *Microscopy*  
153 *research and technique* **43** 511-517 (1998).
- 154 19. Sørensen, B.E. A revised Michel-Lévy interference colour chart based on first-principles  
155 calculations *European Journal of Mineralogy* **25** 5-10 (2012).
